# Supplementary material
Source: Springer Nature journal article supplement (https://www.springermedizin.de/resource/supplementary/12906_2014_2071_MOESM3_ESM.pdf/9523600)
Supplement: MOESM3 [file 9523600]

# Additional file 3: Supplemental figure S1

(a)

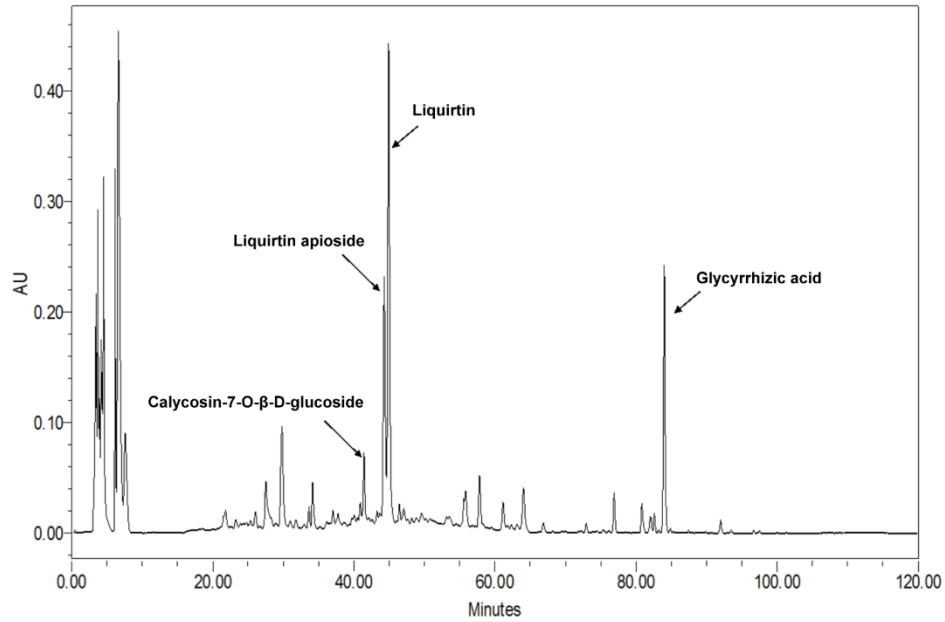

(b)

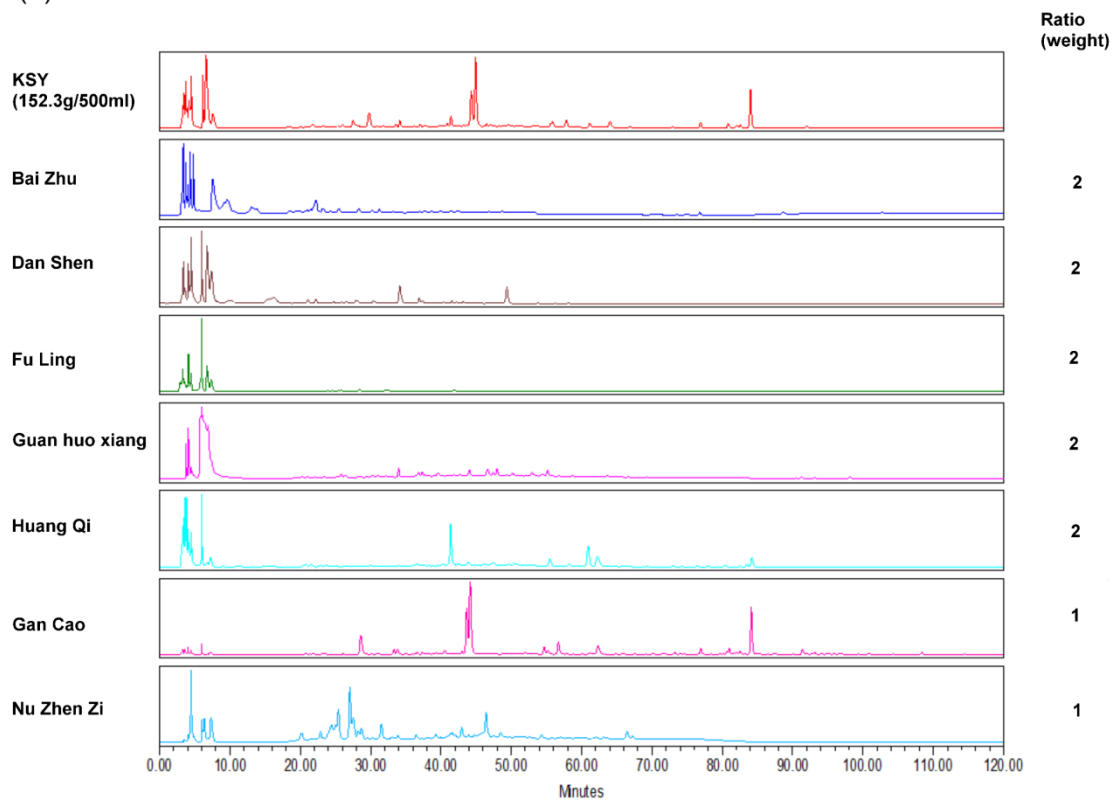

**Supplemental figure 1. HPLC analysis of extracts from KSY and its constituted herbs**

(a) The HPLC profile of KSY. Standard compounds (calycosin-7-O- $\beta$ -D-glucoside, glycyrrhizic acid, liquiritin, liquiritinapioside) identified in KSY were marked. (b)

Comparison of HPLC profiles between each herbal extract and KSY.
